# Supplementary material
Source: publisher site journal article supplement (https://www.dovepress.com/article/387613)

Supplementary Table 1. The levels of cytokines in the supernatants of co-cultured cells

|  | Control group | FGF15 group | P value |
| --- | --- | --- | --- |
| IL-1β(pg/ml) | 19.35 ± 0.75 | 20.20 ± 0.92 | 0.281 |
| TNF-α(pg/ml) | 17.61 ± 2.03 | 16.95 ± 2.45 | 0.737 |
| IL-6 (pg/ml) | 1.79 ± 0.15 | 1.83 ± 0.04 | 0.654 |
| IL-10 (pg/ml) | 13.68 ± 3.83 | 14.02± 0.68 | 0.886 |

Supplementary Figure 1. Flow cytometry analysis of the frequency of CD4+CD25+FOXP3+ Tregs in total CD4+ T cells between the FGF15 and the control groups.


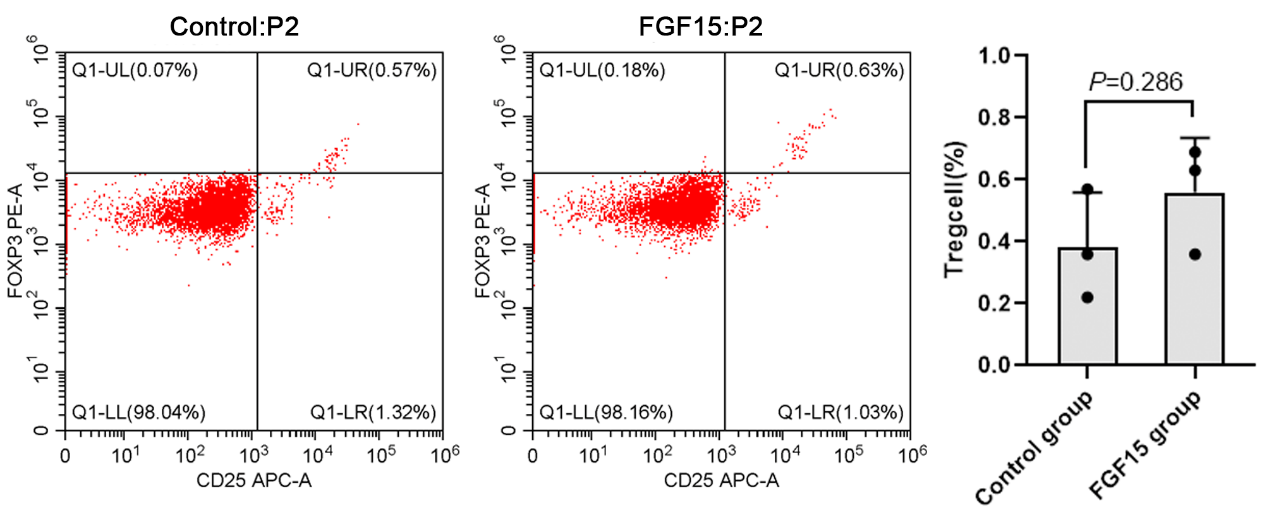

Supplement: Supplementary file 1 [file get_supplementary_file.php]
